# Supplementary material
Source: Springer Nature journal article supplement (https://www.springermedizin.de/resource/supplementary/12990_2008_194_MOESM8_ESM.pdf/9612760)

IP: GPCR

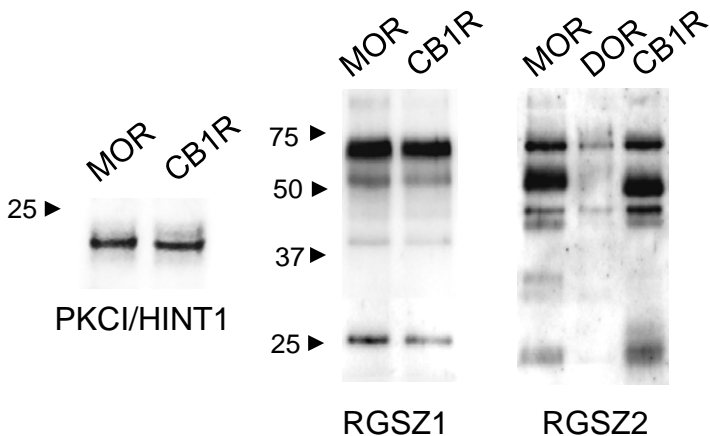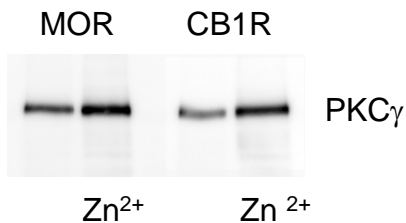

WIN55,212-2 20 nmol/m

IP: CB1R

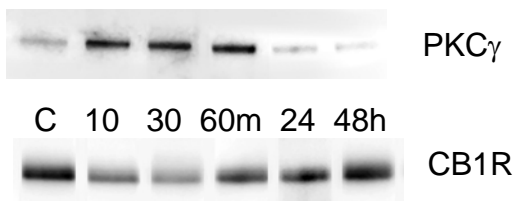

Supplement: MOESM8 [file 9612760]
